# Supplementary material
Source: MDPI journal article supplement (https://www.mdpi.com/2076-3263/12/11/425)

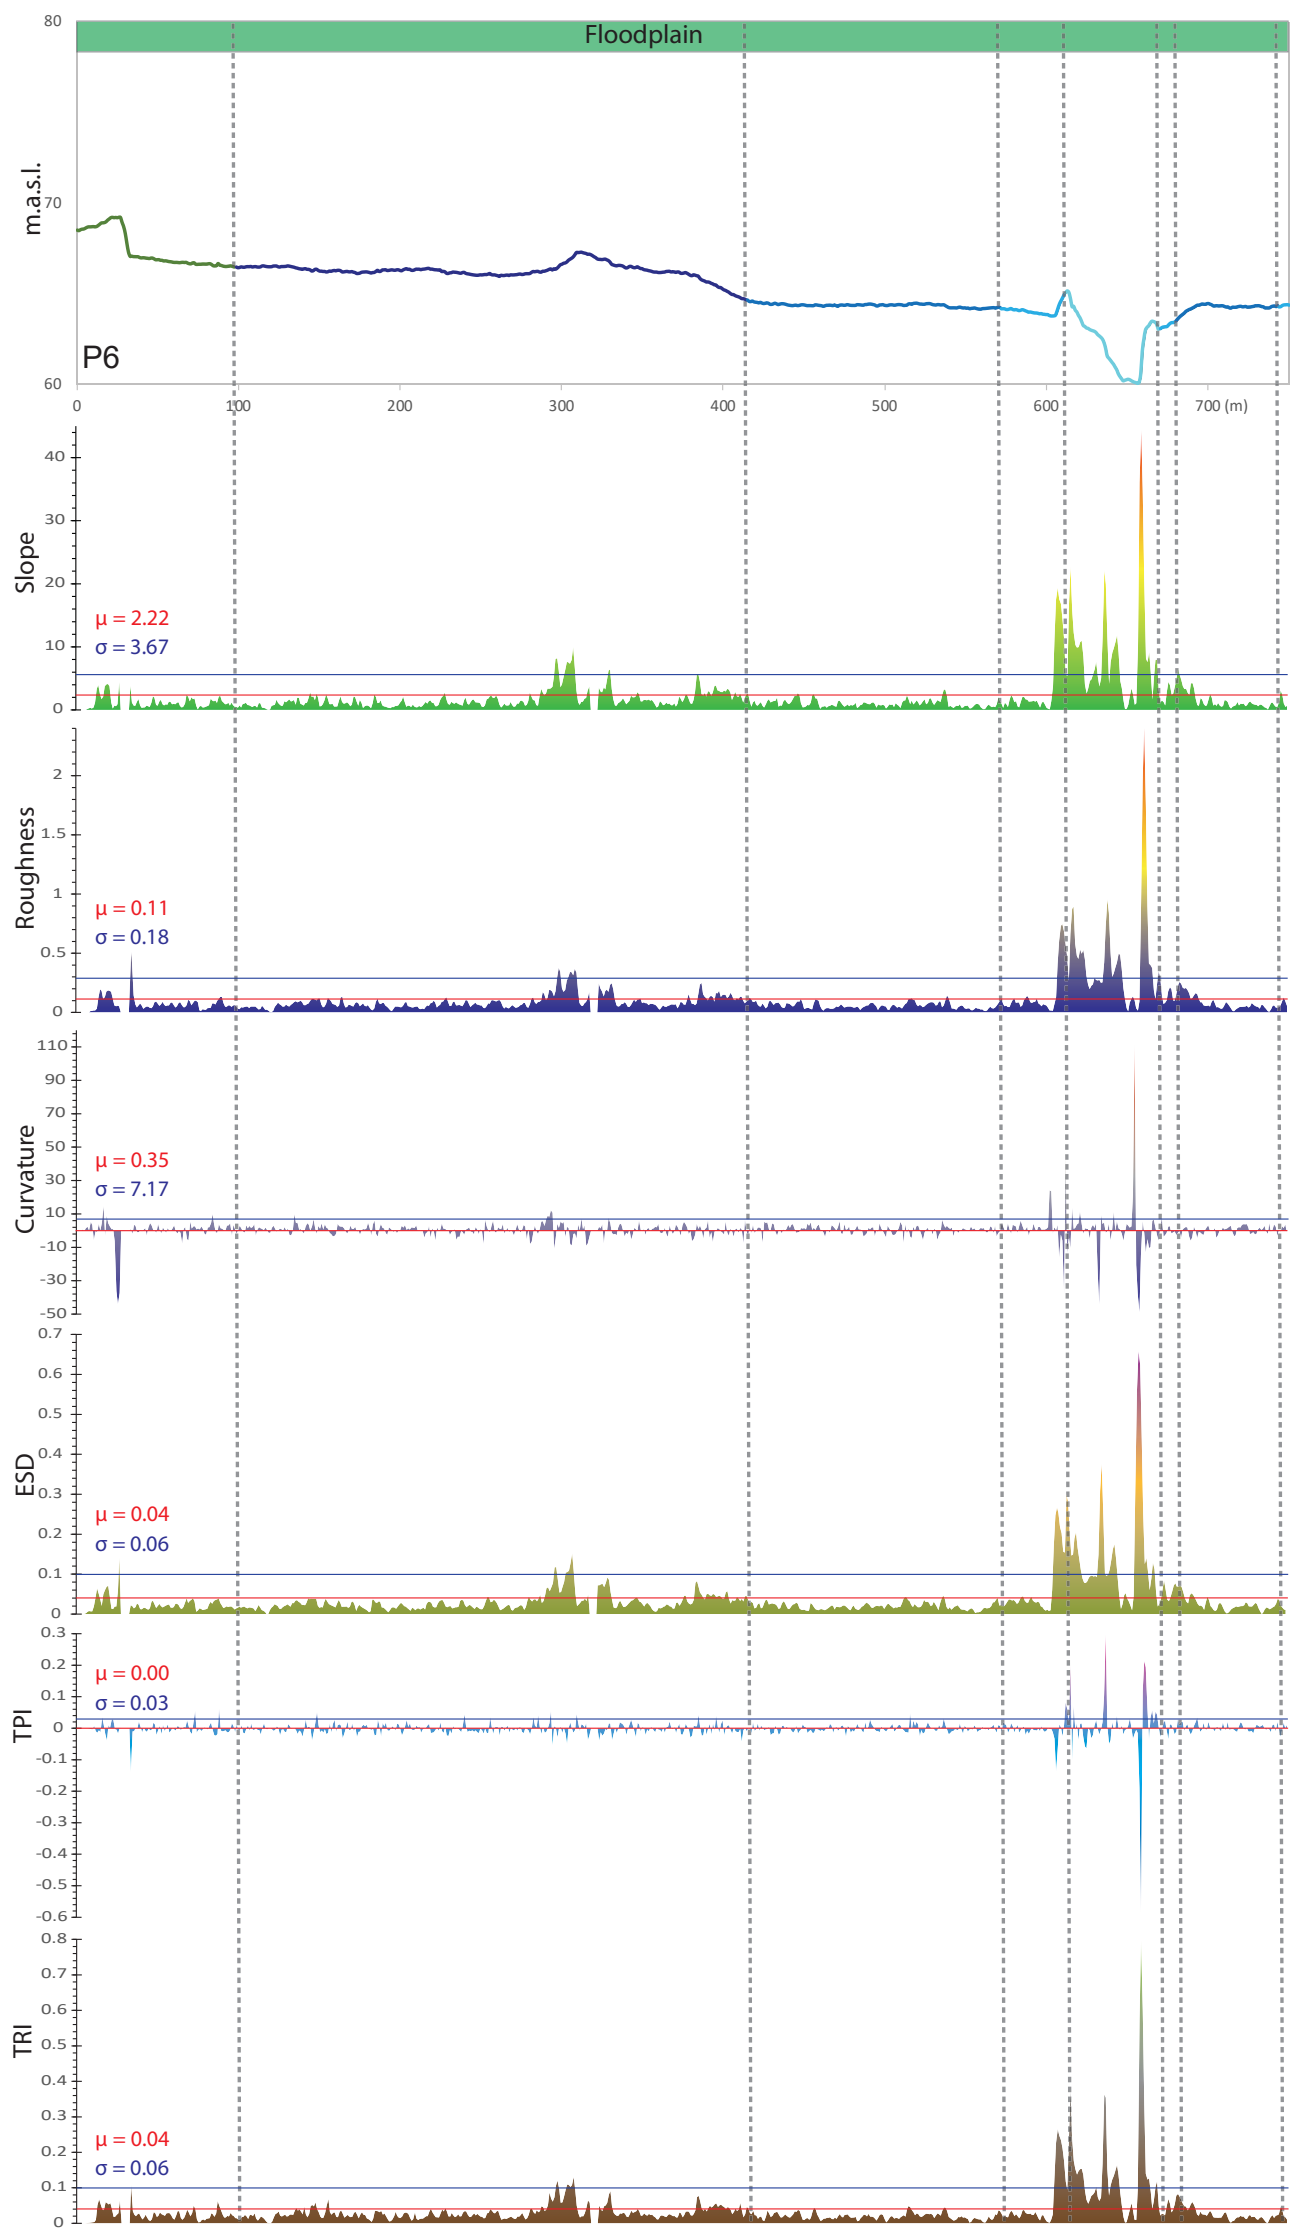

Supplement: s1 [file s1]

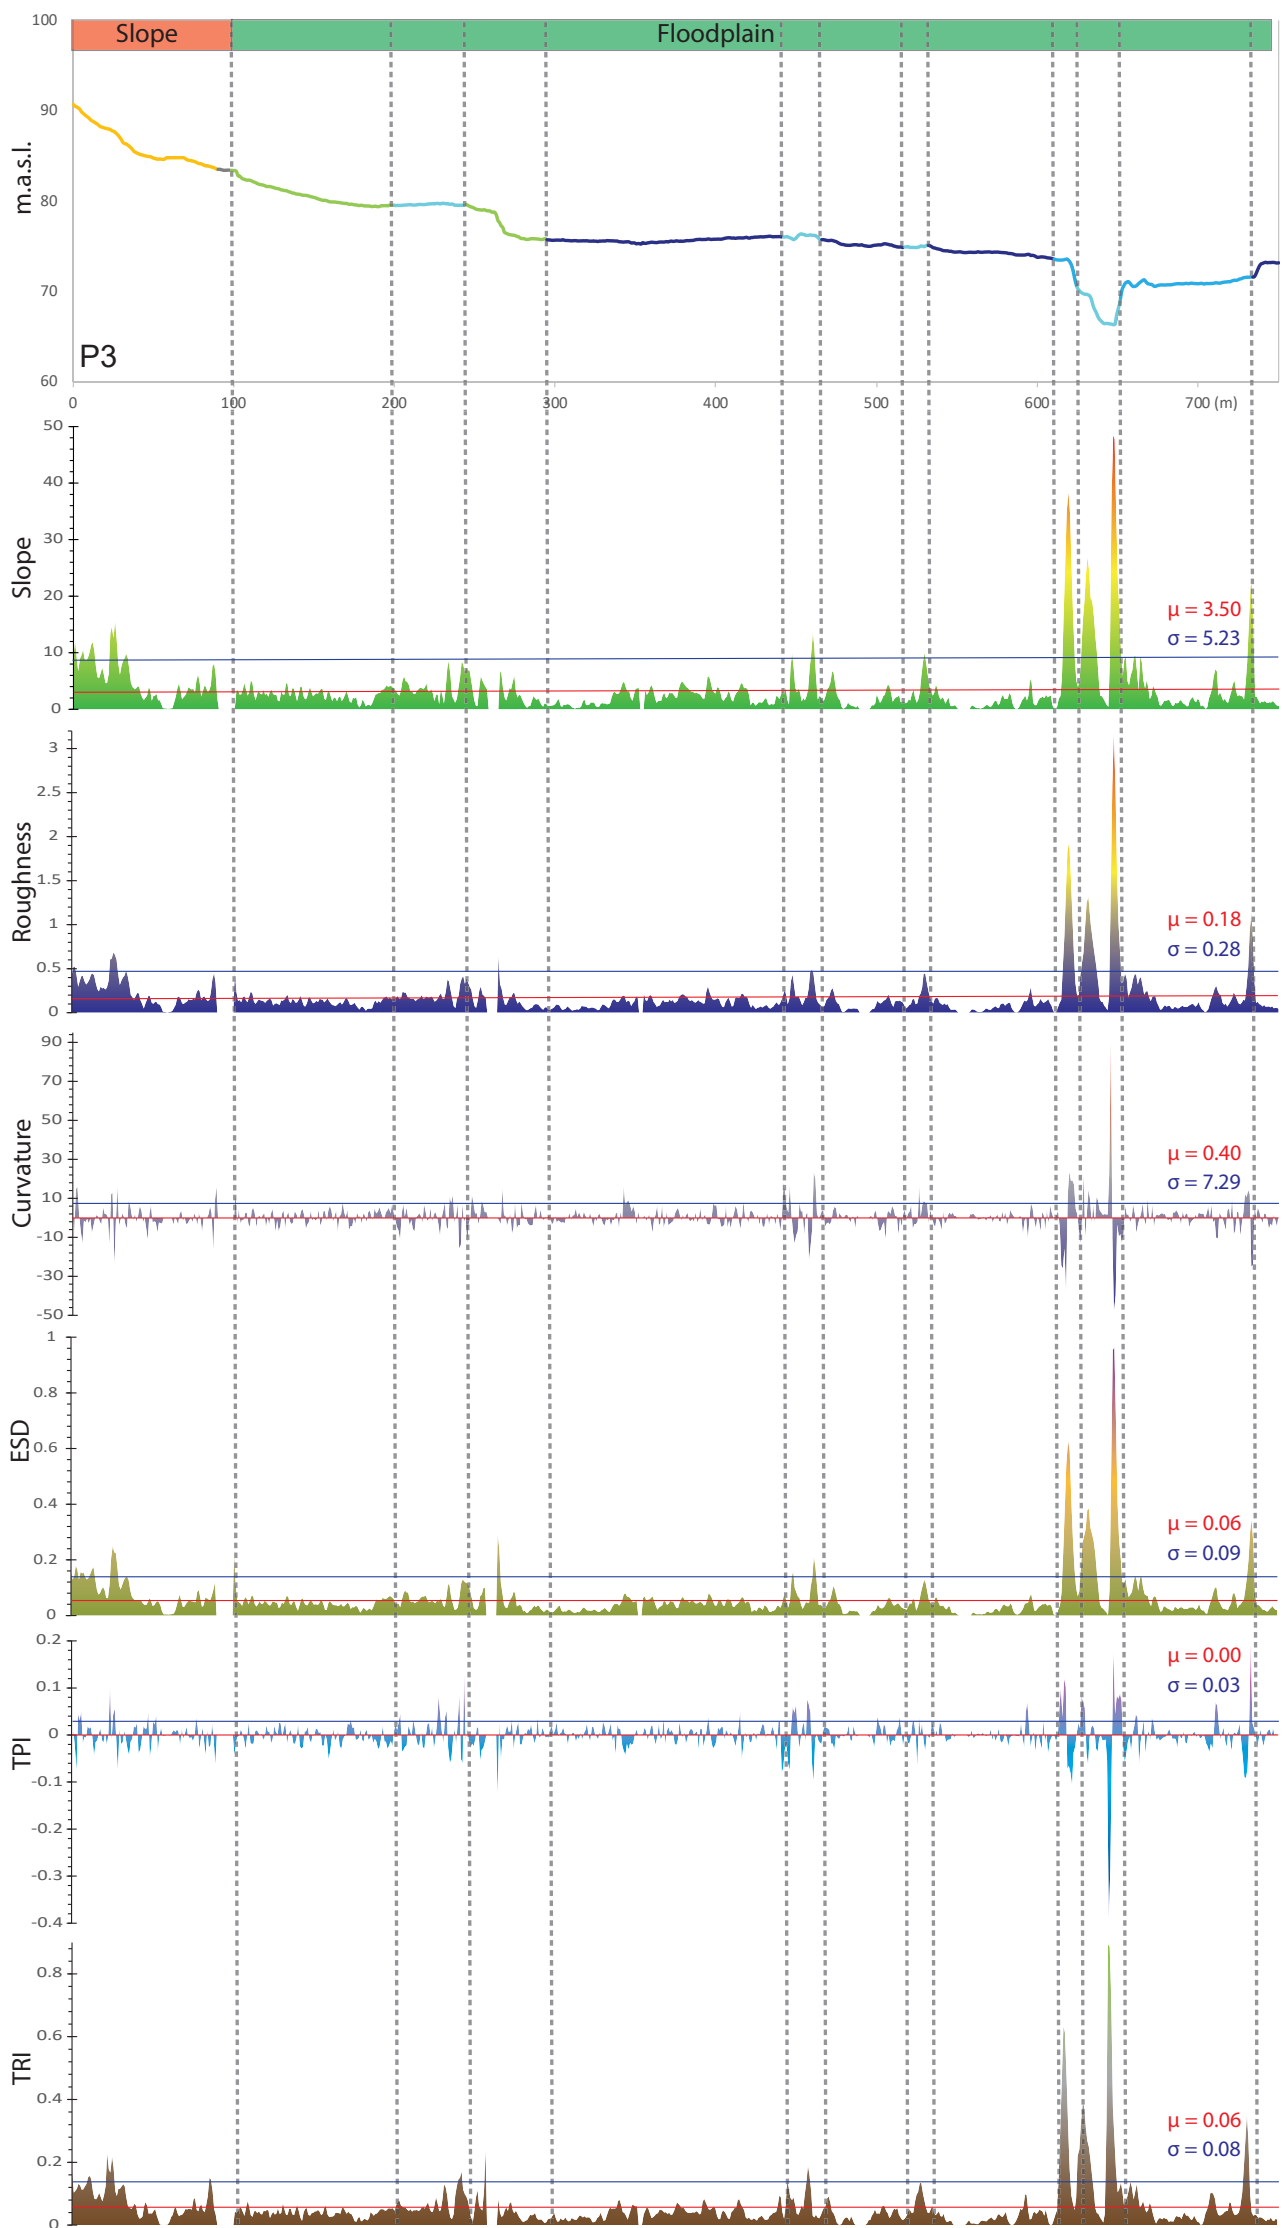

Supplement: s1 [file s1]

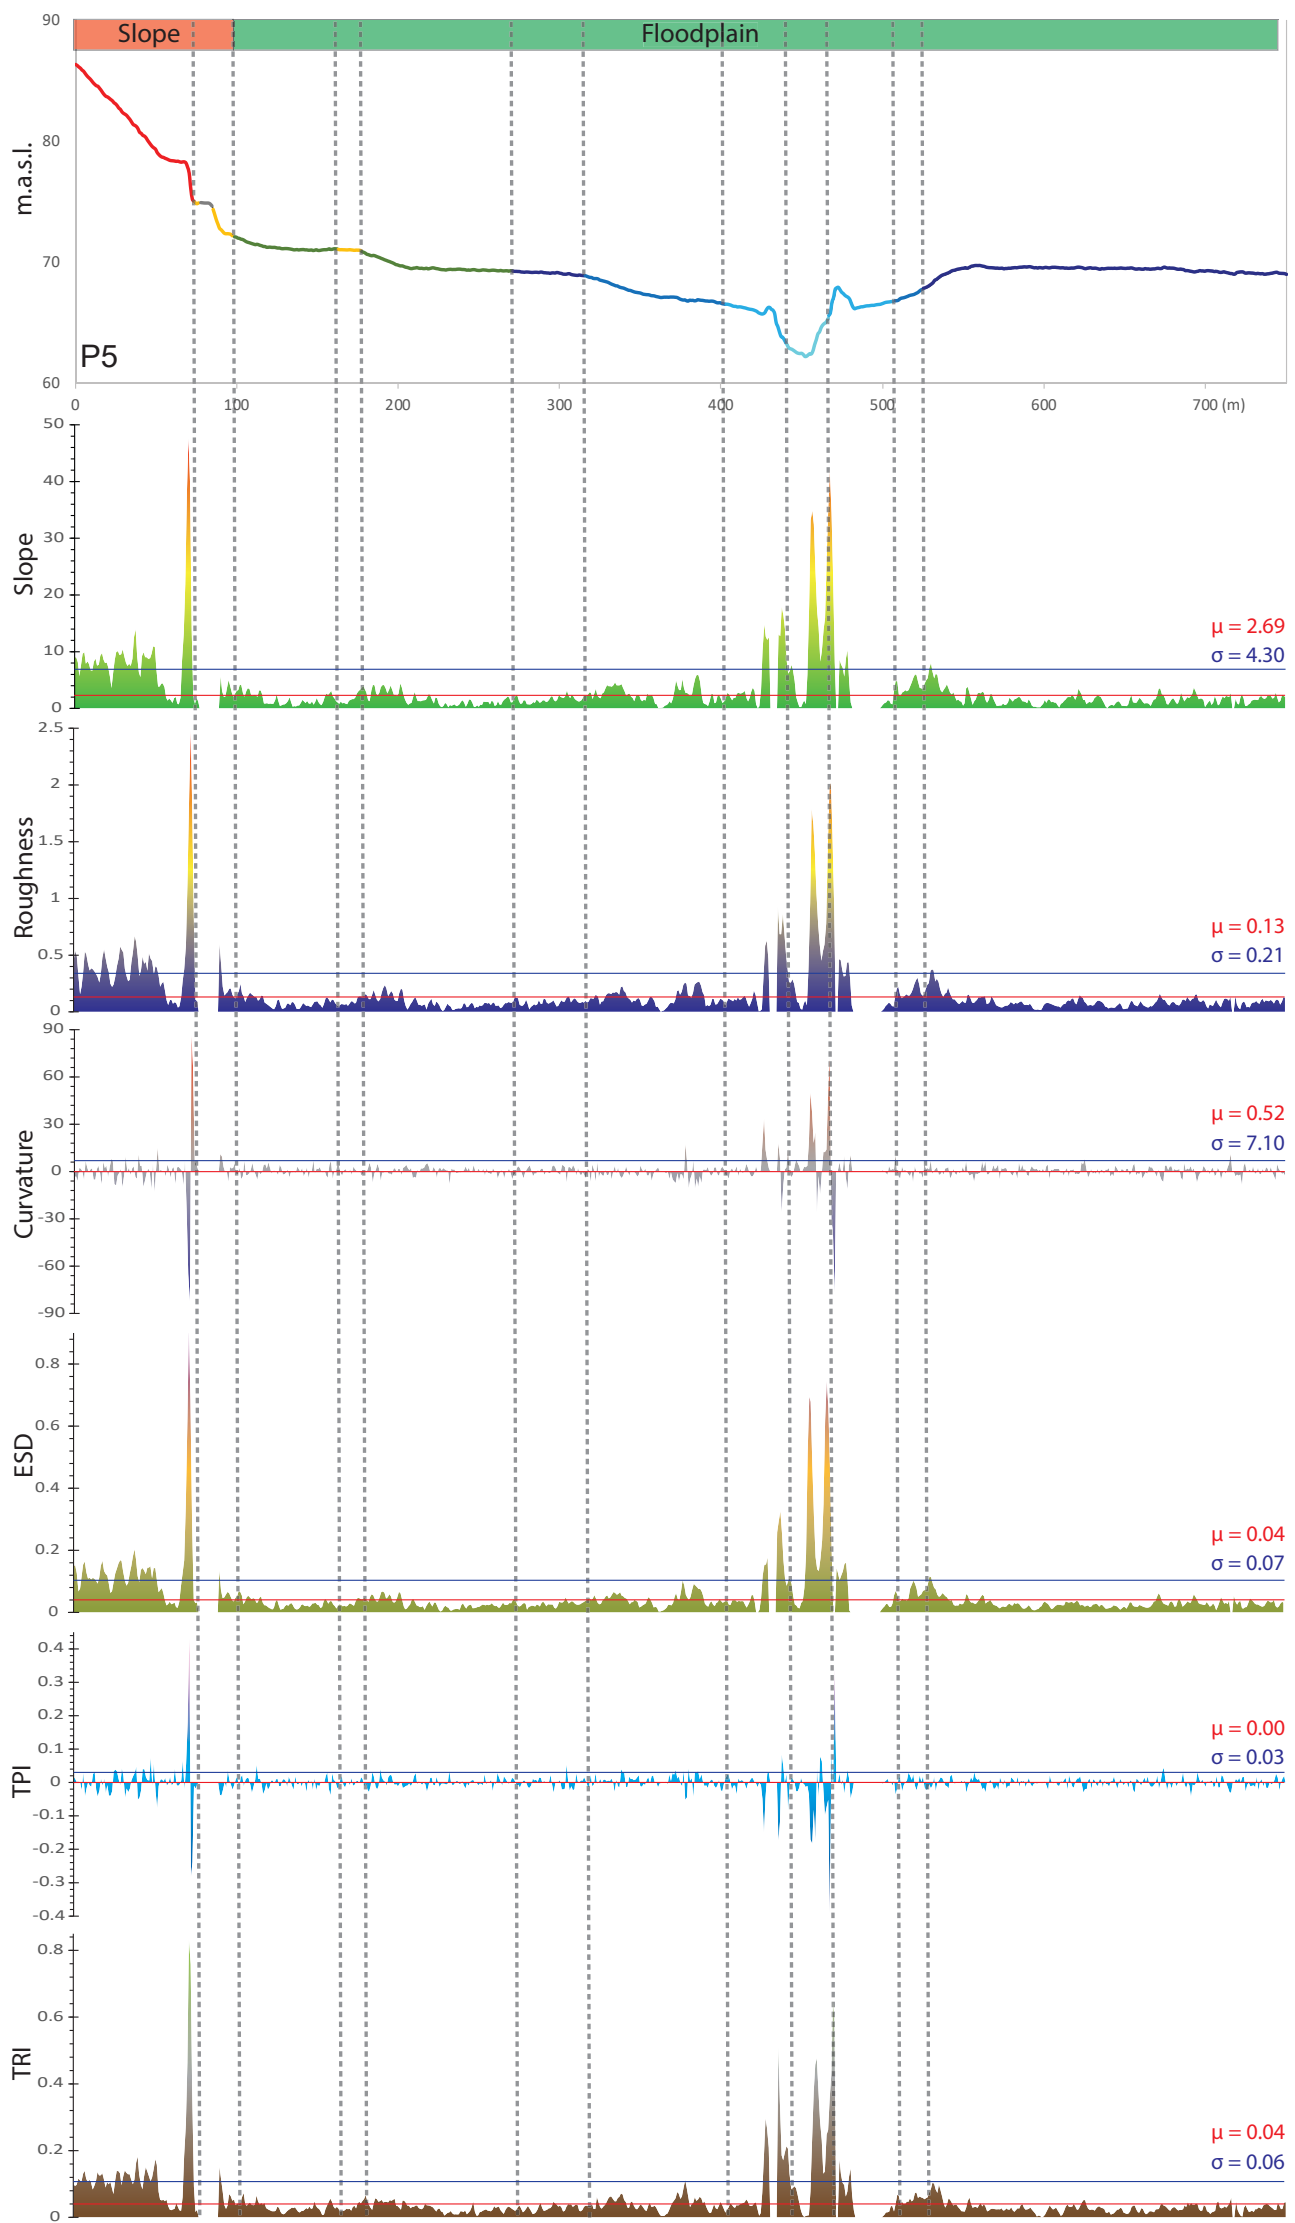

Supplement: s1 [file s1]

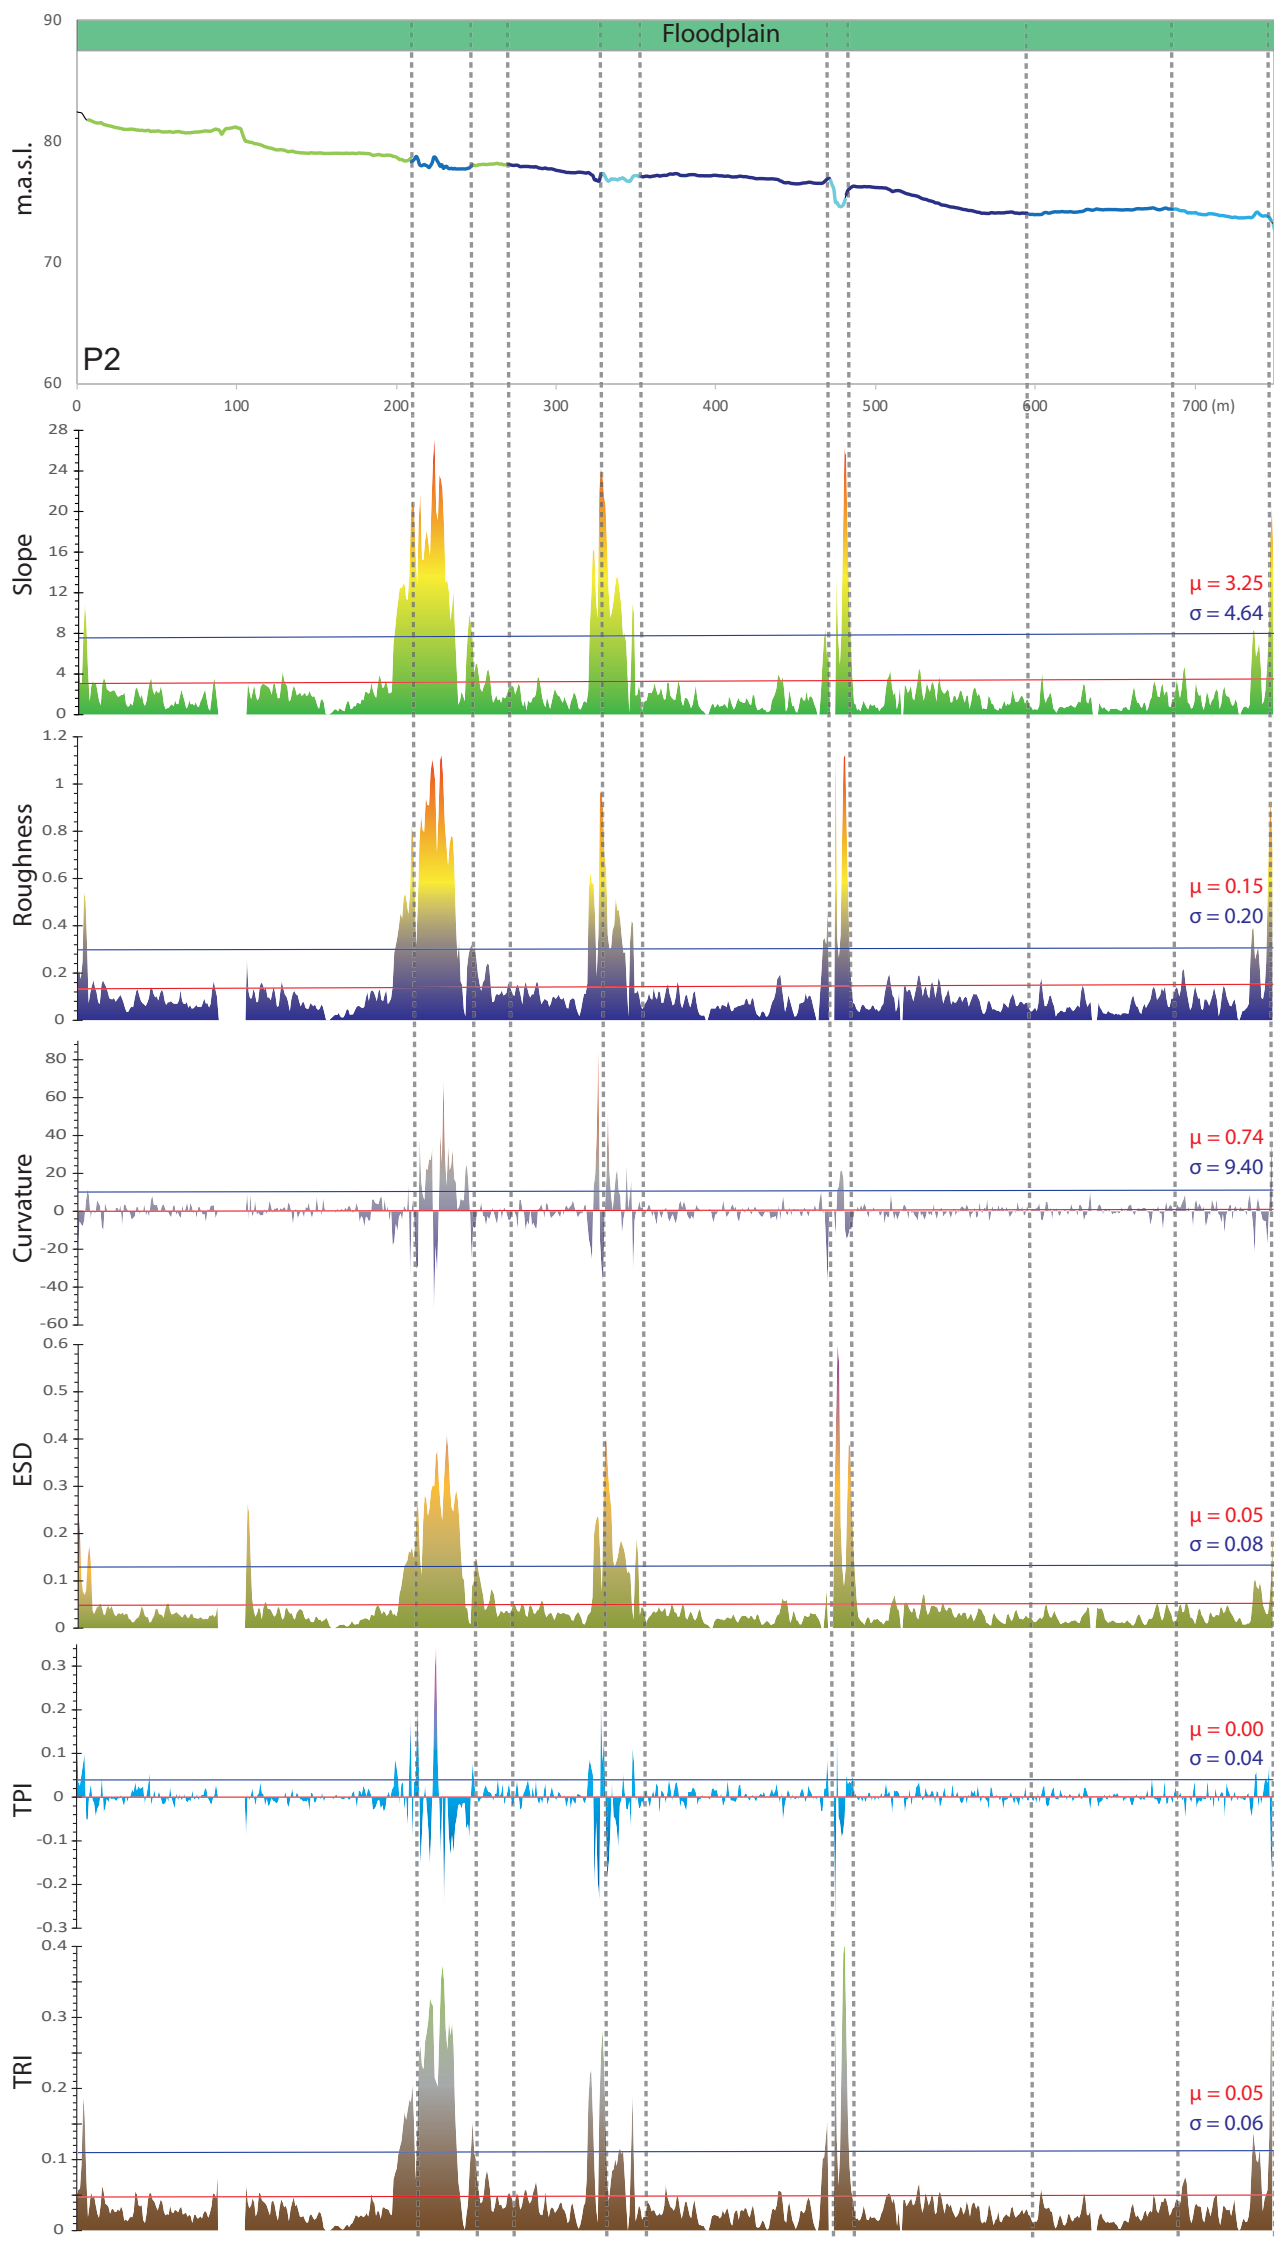

Supplement: s1 [file s1]
